# Supplementary material for: The role of electron-attracting substituents and molecular stacking motifs in the charge transport of tetraazapyrene derivatives
Source: Royal Society of Chemistry journal article supplement (doi:10.1039/c9nj00477g), 2019-01-01
Supplement: c9nj00477g1.pdf [file c9nj00477g1.pdf]

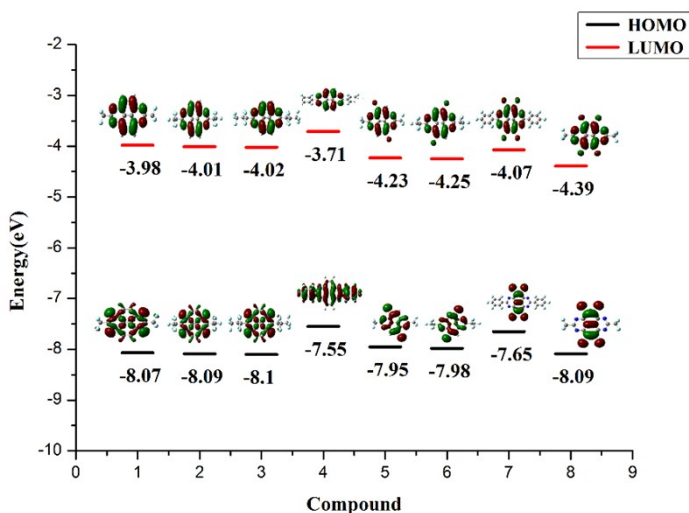

Fig S1. Calculated pictorial representations and energies of HOMOs and LUMOs of TAPy derivatives 1-8 at the B3LYP/6-31+G(d,p)

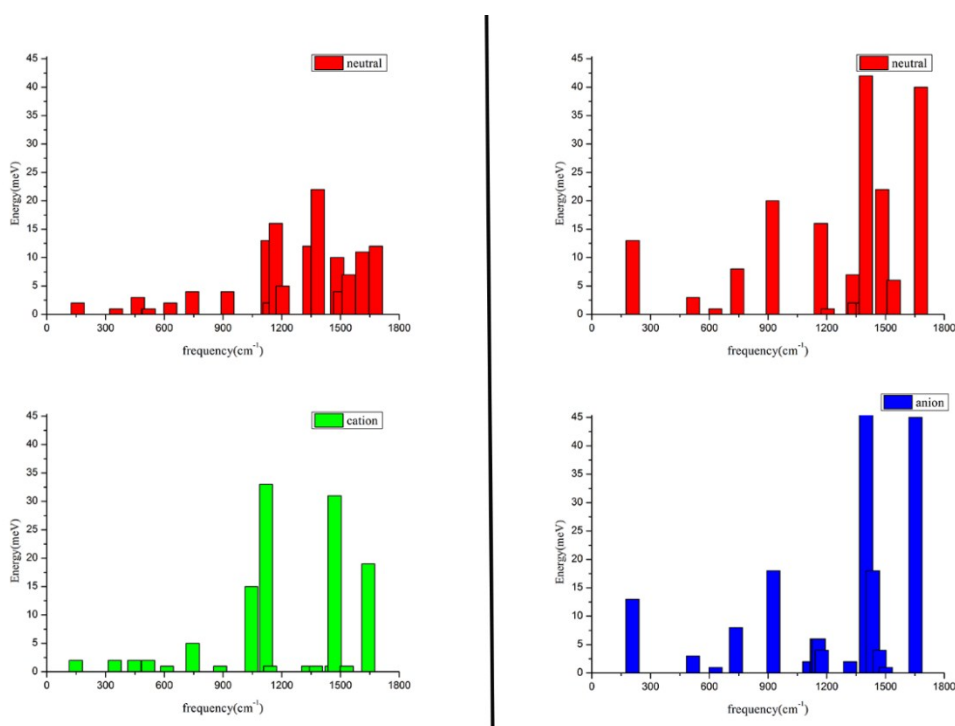

Fig S2. The vibrational frequencies contributions to the intramolecular reorganization energies of 1 neutral (top), anion and cation (bottom) by means of the B3LYP/6-31+G(d,p) calculation.

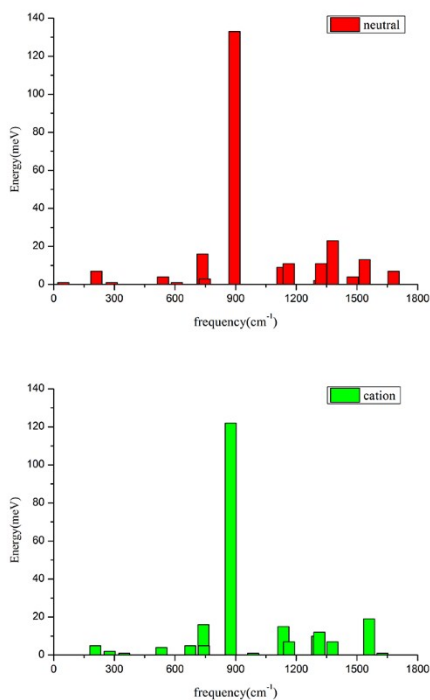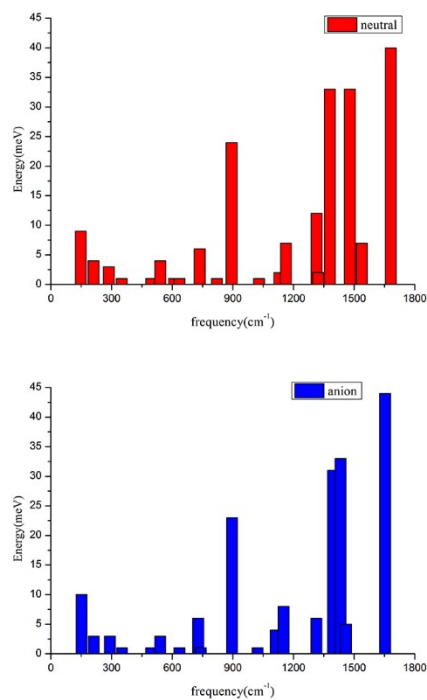

Fig S3. The vibrational frequencies contributions to the intramolecular reorganization energies of 2 neutral (top), anion and cation (bottom) by means of the B3LYP/6-31+G (d,p) calculation.

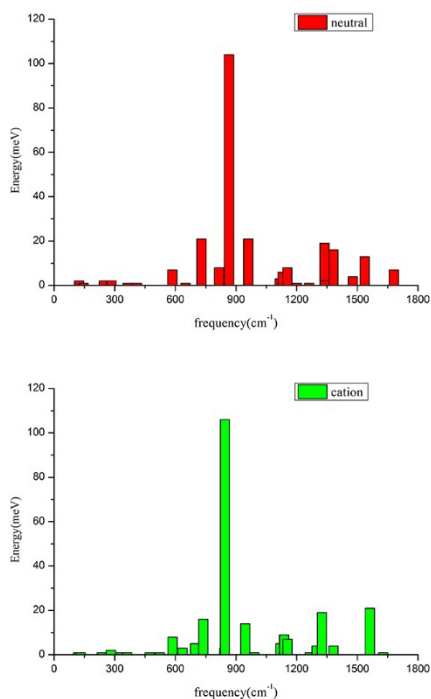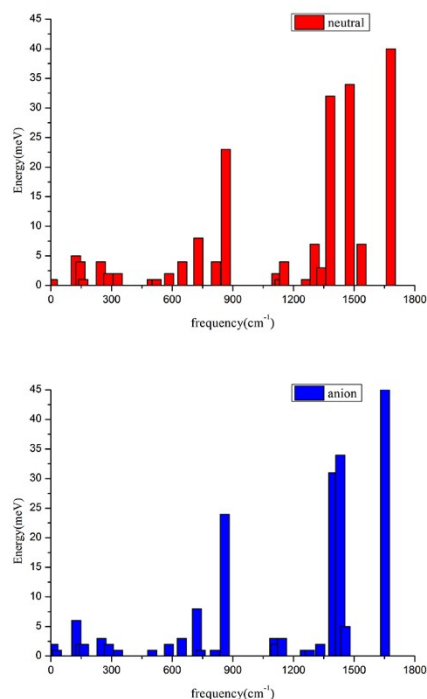

Fig S4. The vibrational frequencies contributions to the intramolecular reorganization energies of 3 neutral (top), anion and cation (bottom) by means of the B3LYP/6-31+G (d,p) calculation.

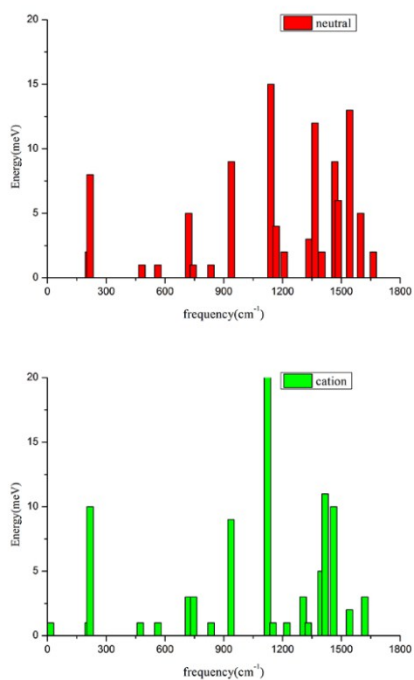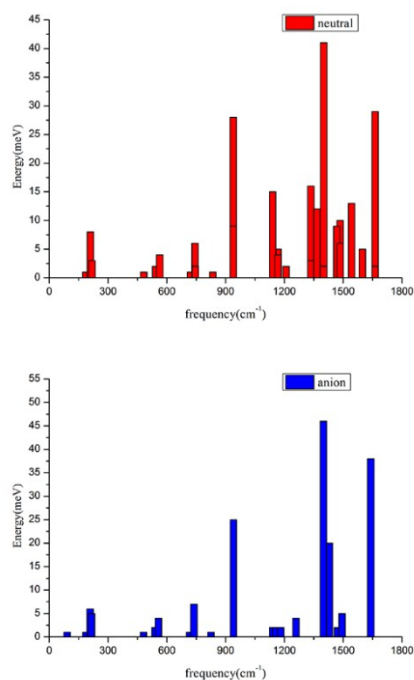

Fig S5. The vibrational frequencies contributions to the intramolecular reorganization energies of 5 neutral (top), anion and cation (bottom) by means of the B3LYP/6-31+G (d,p) calculation.

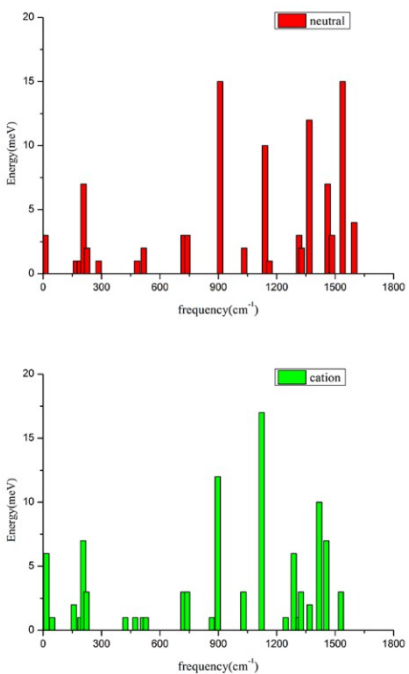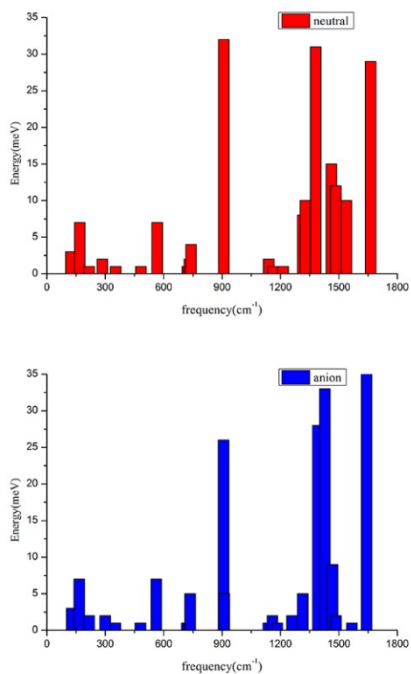

Fig S6. The vibrational frequencies contributions to the intramolecular reorganization energies of 6 neutral (top), anion and cation (bottom) by means of the B3LYP/6-31+G (d,p) calculation.

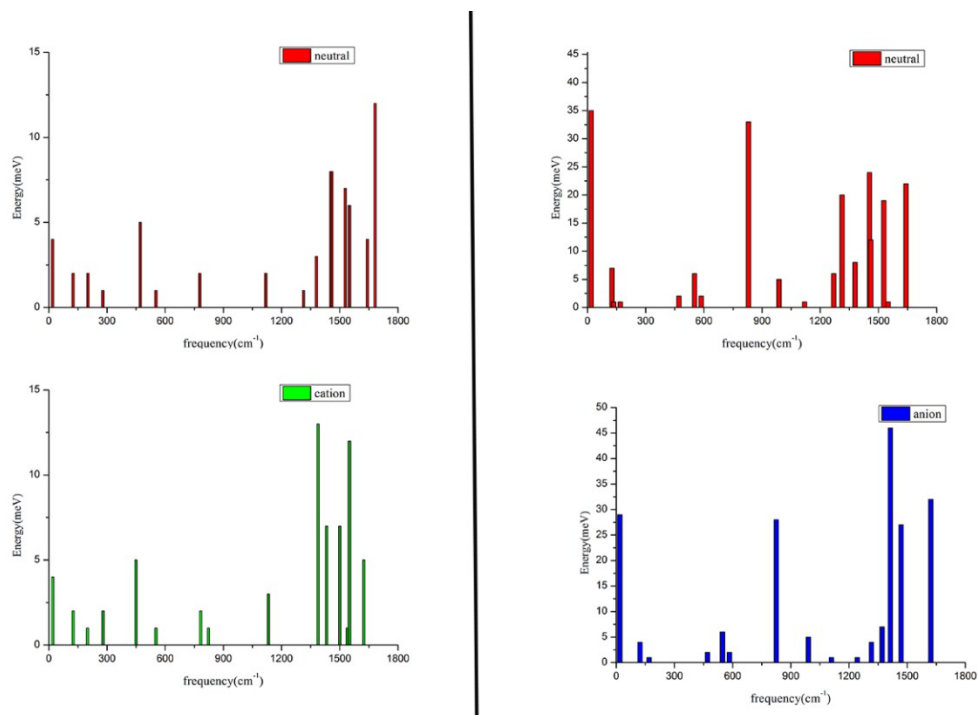

Fig S7. The vibrational frequencies contributions to the intramolecular reorganization energies of 7 neutral (top), anion and cation (bottom) by means of the B3LYP/6-31+G (d,p) calculation.

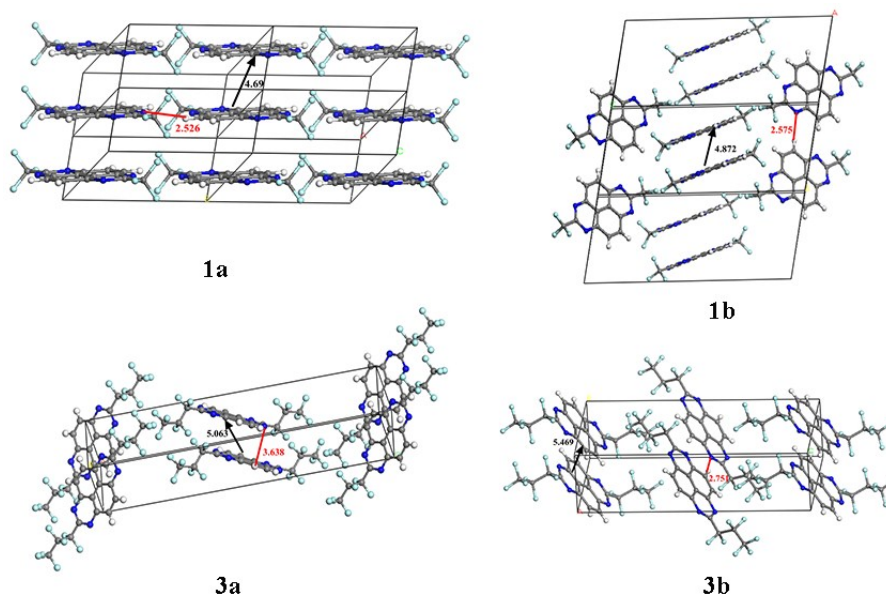

Fig S8. Crystal structures of two polymorphs of compounds 1 and 3

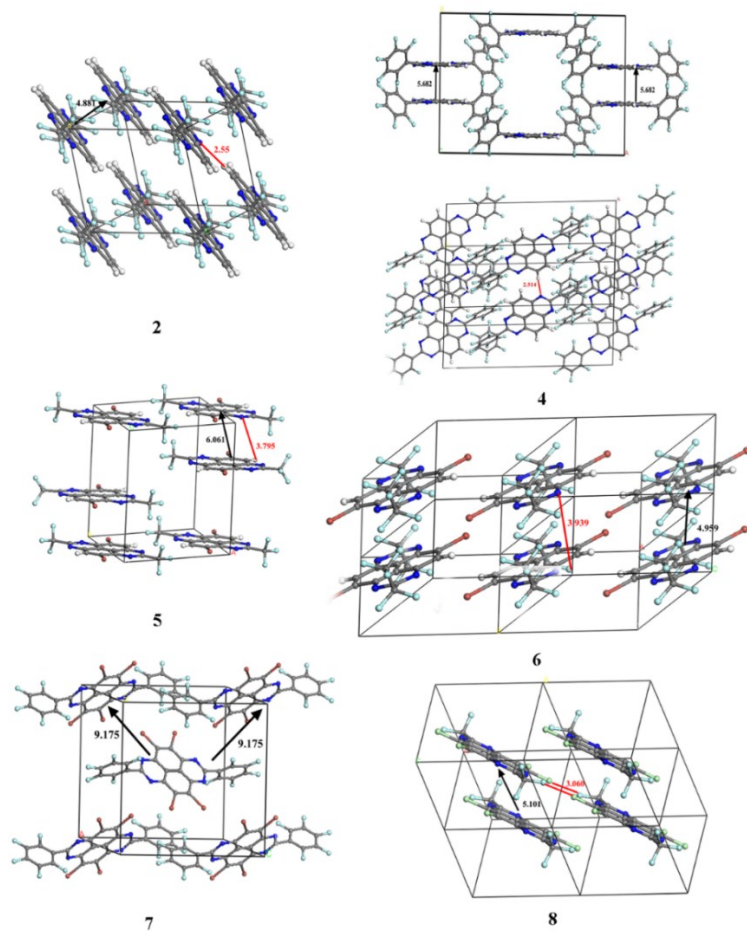

Fig S9. Crystal structures of compound 2, 4, 5, 6, 7, and 8

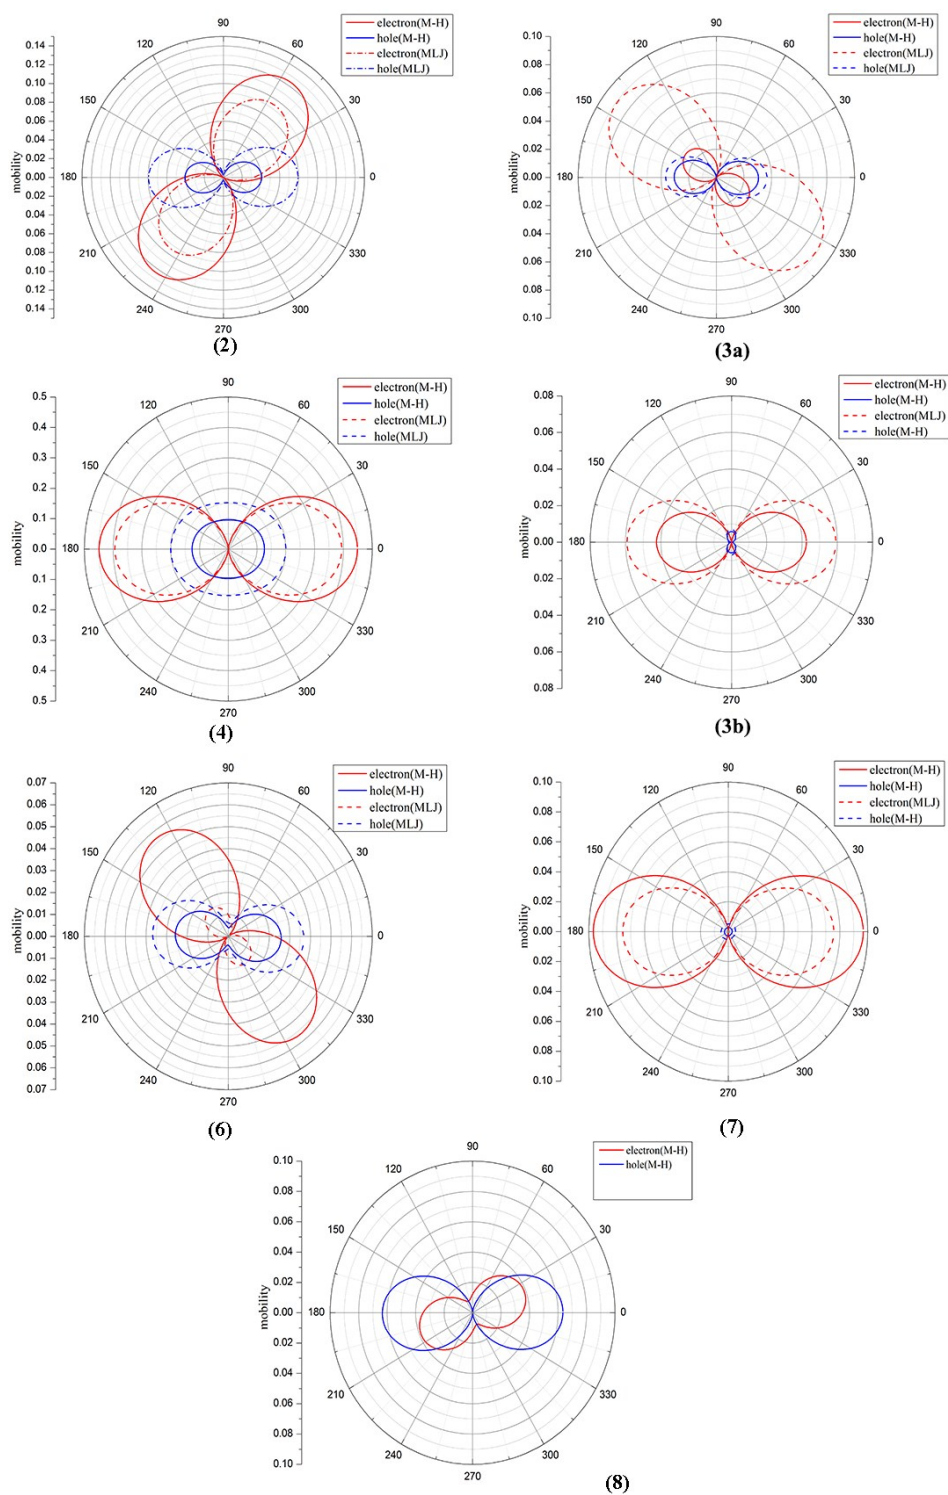

Fig S 10. Predicted anisotropic mobilities obtained in the a–b plane in the single crystals for TAPy derivatives 2-8

Table S1 Absolute energies of the neutral and charged species employed to evaluate the intramolecular reorganization energies according to the AP method along with vertical and adiabatic EAs.

b3pw91/6-  $E^0(G^0)$   $E^+(G^+)$   $E^-(G^-)$   $E^+(G^0)$   $E^-(G^0)$   $E^0(G^+)$   $E^0(G^-)$

| 311+g(d,p)        |             |             |             |              |             |             |              |
|-------------------|-------------|-------------|-------------|--------------|-------------|-------------|--------------|
| 1                 | -1353.84702 | -1353.48783 | -1353.9446  | -1353.4835   | -1353.9379  | -1353.84185 | -1353.842619 |
| 2                 | -1829.38369 | -1829.02376 | -1829.48377 | -1829.01256  | -1829.4768  | -1829.37936 | -1829.376798 |
| 3                 | -2304.91395 | -2304.56662 | -2305.01511 | -2304.55751  | -2305.00797 | -2304.90422 | -2304.906698 |
| 4                 | -2134.08269 | -2133.76189 | -2134.17641 | -2133.75582  | -2134.16883 | -2134.07637 | -2134.075204 |
| 5                 | -6500.89006 | -6500.54487 | -6501.00083 | -6500.54137  | -6500.99420 | -6500.88619 | -6500.88350  |
| 6                 | -6976.42680 | -6976.08129 | -6976.53953 | -6976.07772  | -6976.53271 | -6976.4226  | -6976.42005  |
| 7                 | -12428.1619 | -12427.8409 | -12428.2749 | -12427.83830 | -12428.2678 | -12428.1591 | -12428.15496 |
| 8                 | -3192.09701 | -3191.74877 | -3192.2139  | -3191.74451  | -3192.20732 | -3192.0926  | -3192.090262 |
| b3lyp/6-31+g(d,p) | $E^0(G^0)$  | $E^+(G^+)$  | $E(G)$      | $E^-(G^-)$   | $E(G^0)$    | $E^0(G^+)$  | $E^0(G^-)$   |
| 1                 | -1354.06100 | -1353.70615 | -1354.15607 | -1353.7021   | -1354.14939 | -1354.05621 | -1354.054388 |
| 2                 | -1829.65161 | -1829.30481 | -1829.74924 | -1829.28366  | -1829.74236 | -1829.65623 | -1829.644796 |
| 3                 | -2305.23702 | -2304.89075 | -2305.33573 | -2304.88233  | -2305.32865 | -2305.22773 | -2305.230044 |
| 4                 | -2134.41727 | -2134.09686 | -2134.50855 | -2134.09093  | -2134.50103 | -2134.41119 | -2134.409992 |
| 5                 | -6496.30818 | -6495.96635 | -6496.41655 | -6495.96291  | -6496.41999 | -6496.30439 | -6496.301683 |
| 6                 | -6971.89943 | -6971.55719 | -6972.00988 | -6971.55374  | -6972.00315 | -6971.8956  | -6971.892764 |
| 7                 | -12418.9139 | -12418.5941 | -12419.0245 | -12418.5917  | -12419.0174 | -12418.9113 | -12418.90697 |
| 8                 | -3191.77701 | -3191.41877 | -3191.8939  | -3191.42451  | -3191.89732 | -3191.7636  | -3191.761262 |

Table S2. Effective frequency  $\omega_{\text{eff}}$  and associated HR factor  $S_{\text{eff}}$  employed in the evaluation of charge transfer rate constants of 1-7 (B3LYP/6-31G\*)

|                          |          | 1     | 2     | 3     | 4     | 5     | 6     | 7     |
|--------------------------|----------|-------|-------|-------|-------|-------|-------|-------|
| $S_{\text{eff}}$         | hole     | 0.949 | 3.721 | 3.808 | 1.878 | 1.936 | 1.688 | 2.986 |
| $W_{\text{eff}}$         |          | 2141  | 1040  | 1044  | 1456  | 825   | 970   | 1094  |
| $\lambda_{\text{class}}$ |          | 0.004 | 0.012 | 0.008 | 0.035 | 0.021 | 0.031 | 0.016 |
| $S_{\text{eff}}$         | electron | 2.133 | 1.759 | 2.269 | 1.970 | 1.458 | 1.980 | 3.141 |
| $W_{\text{eff}}$         |          | 1369  | 1710  | 1361  | 1608  | 1969  | 1487  | 1040  |
| $\lambda_{\text{class}}$ |          | 0.026 | 0.026 | 0.031 | 0.040 | 0.023 | 0.026 | 0.078 |

Table S3. Charge transfer rate constants calculated by the semiclassical Marcus-Hush and quantum-corrected Marcus-Levich-Jortner models (in  $\text{s}^{-1}$ )

|       |    | $W_{h-MH}$             | $W_{e-MH}$             | $W_{h-MLJ}$            | $W_{e-MLJ}$            |
|-------|----|------------------------|------------------------|------------------------|------------------------|
| 1a/xy | 1  | $6.817 \times 10^{12}$ | $2.647 \times 10^8$    | $2.021 \times 10^{13}$ | $3.003 \times 10^8$    |
|       | 2  | $6.472 \times 10^{10}$ | $1.034 \times 10^{10}$ | $1.918 \times 10^{11}$ | $1.173 \times 10^{10}$ |
|       | 3  | $4.190 \times 10^{11}$ | $2.680 \times 10^{12}$ | $1.242 \times 10^{12}$ | $3.041 \times 10^{12}$ |
|       | 4  | $7.991 \times 10^8$    | $4.485 \times 10^7$    | $2.368 \times 10^9$    | $5.066 \times 10^7$    |
| yz    | 5  | $4.190 \times 10^{11}$ | $2.680 \times 10^{12}$ | $1.242 \times 10^{12}$ | $3.041 \times 10^{12}$ |
|       | 6  | $3.328 \times 10^5$    | $3.376 \times 10^7$    | $9.864 \times 10^5$    | $3.831 \times 10^7$    |
|       | 7  | $5.668 \times 10^{11}$ | $1.118 \times 10^{10}$ | $1.680 \times 10^{12}$ | $1.269 \times 10^{11}$ |
|       | 8  | $2.995 \times 10^6$    | $4.136 \times 10^6$    | $8.878 \times 10^6$    | $4.693 \times 10^6$    |
| xz    | 9  | $6.817 \times 10^{12}$ | $2.553 \times 10^8$    | $2.021 \times 10^{13}$ | $3.003 \times 10^8$    |
|       | 10 | $3.954 \times 10^9$    | $1.284 \times 10^{10}$ | $1.172 \times 10^{10}$ | $1.457 \times 10^{10}$ |
|       | 11 | $5.668 \times 10^{11}$ | $1.112 \times 10^{10}$ | $1.685 \times 10^{12}$ | $1.262 \times 10^{10}$ |
|       | 12 | $2.609 \times 10^8$    | $8.440 \times 10^6$    | $7.733 \times 10^8$    | $9.577 \times 10^7$    |

|       |   |                        |                        |                        |                        |
|-------|---|------------------------|------------------------|------------------------|------------------------|
| 1b/xy | 1 | $3.567 \times 10^{11}$ | $2.433 \times 10^{12}$ | $1.202 \times 10^{12}$ | $2.761 \times 10^{12}$ |
|       | 2 | $2.927 \times 10^5$    | $1.426 \times 10^7$    | $9.864 \times 10^5$    | $1.618 \times 10^8$    |
|       | 3 | $3.755 \times 10^{12}$ | $1.155 \times 10^9$    | $1.266 \times 10^{13}$ | $1.310 \times 10^9$    |
|       | 4 | $1.223 \times 10^{13}$ | $2.28 \times 10^9$     | $4.122 \times 10^{13}$ | $2.301 \times 10^9$    |
| yz    | 5 | $3.567 \times 10^{11}$ | $2.433 \times 10^{12}$ | $1.202 \times 10^{12}$ | $2.761 \times 10^{12}$ |
|       | 6 | $6.324 \times 10^9$    | $5.403 \times 10^9$    | $2.132 \times 10^{10}$ | $6.130 \times 10^9$    |
|       | 7 | $1.717 \times 10^{12}$ | $2.235 \times 10^9$    | $3.946 \times 10^{12}$ | $4.805 \times 10^9$    |
|       | 8 | $1.725 \times 10^9$    | $2.110 \times 10^6$    | $4.297 \times 10^9$    | $2.394 \times 10^6$    |

Table S4. Calculated center-of-mass distances (in Å), charge transfer integrals (in meV) and charge transfer rate constants (in  $s^{-1}$ ) for all possible hopping channels by the semiclassical Marcus-Hush and quantum-corrected Marcus-Levich-Jortner models.

|    | $\theta$ | s      | $V_{ije}$ | $V_{ijh}$ | $W_{h-MH}$ | $W_{e-MH}$            | $W_{h-MLJ}$           | $W_{e-MLJ}$           |                       |
|----|----------|--------|-----------|-----------|------------|-----------------------|-----------------------|-----------------------|-----------------------|
| 2  | 1        | 0.00   | 7.116     | 28.87     | -5.43      | $5.96 \times 10^{11}$ | $1.28 \times 10^{10}$ | $1.16 \times 10^{12}$ | $9.72 \times 10^9$    |
|    | 2        | 54.64  | 8.534     | 10.23     | -45.45     | $7.49 \times 10^{10}$ | $8.95 \times 10^{11}$ | $1.46 \times 10^{11}$ | $6.81 \times 10^{11}$ |
|    | 3        | 88.65  | 4.881     | -16.22    | 2.08       | $1.88 \times 10^{11}$ | $1.87 \times 10^9$    | $3.66 \times 10^{11}$ | $1.43 \times 10^9$    |
|    | 4        | 123.53 | 8.723     | 0.03      | 0.11       | $6.44 \times 10^5$    | $5.24 \times 10^6$    | $1.25 \times 10^6$    | $3.99 \times 10^6$    |
| 3a | 1        | 0.00   | 6.776     | 25.38     | -4.93      | $3.91 \times 10^{11}$ | $4.05 \times 10^9$    | $4.70 \times 10^{11}$ | $5.66 \times 10^9$    |
|    | 2        | 36.77  | 8.459     | 0.19      | -0.07      | $2.19 \times 10^5$    | $8.17 \times 10^5$    | $2.63 \times 10^7$    | $1.14 \times 10^6$    |
|    | 3        | 90.00  | 5.063     | -0.22     | 1.26       | $2.94 \times 10^7$    | $2.65 \times 10^8$    | $3.53 \times 10^7$    | $3.70 \times 10^8$    |
|    | 4        | 143.23 | 8.459     | 10.45     | 35.01      | $6.63 \times 10^{10}$ | $2.04 \times 10^{11}$ | $7.96 \times 10^{10}$ | $6.52 \times 10^{11}$ |
| 3b | 1        | 0.00   | 8.662     | 6.37      | 41.9       | $2.46 \times 10^{10}$ | $2.93 \times 10^{11}$ | $2.96 \times 10^{10}$ | $4.09 \times 10^{11}$ |
|    | 2        | 32.27  | 10.244    | 0.15      | -0.21      | $1.37 \times 10^7$    | $7.35 \times 10^6$    | $1.64 \times 10^7$    | $1.03 \times 10^7$    |
|    | 3        | 90.00  | 5.469     | -14.11    | -0.62      | $1.21 \times 10^{11}$ | $6.41 \times 10^7$    | $1.45 \times 10^{11}$ | $8.95 \times 10^7$    |
|    | 4        | 147.73 | 10.244    | -0.35     | 1.8        | $7.44 \times 10^7$    | $5.40 \times 10^8$    | $8.93 \times 10^7$    | $7.54 \times 10^8$    |
| 4  | 1        | 0.00   | 8.561     | -8.32     | 53.63      | $3.45 \times 10^{10}$ | $3.20 \times 10^{12}$ | $5.49 \times 10^{10}$ | $2.81 \times 10^{12}$ |
|    | 2        | 41.12  | 5.682     | -84.57    | -3.95      | $3.57 \times 10^{12}$ | $1.74 \times 10^{10}$ | $5.68 \times 10^{12}$ | $1.52 \times 10^{10}$ |
|    | 3        | 138.84 | 5.682     | -84.5     | -3.91      | $3.56 \times 10^{12}$ | $1.70 \times 10^{10}$ | $5.67 \times 10^{12}$ | $1.49 \times 10^{10}$ |
| 6  | 1        | 0.00   | 4.959     | 29.68     | -4.6       | $6.88 \times 10^{11}$ | $9.94 \times 10^{10}$ | $9.83 \times 10^{11}$ | $2.76 \times 10^{10}$ |
|    | 2        | 69.80  | 8.895     | 0.01      | -0.03      | $7.81 \times 10^4$    | $4.23 \times 10^6$    | $1.12 \times 10^5$    | $1.18 \times 10^6$    |
|    | 3        | 102.74 | 8.559     | -14.14    | 4.75       | $1.56 \times 10^{11}$ | $1.06 \times 10^{11}$ | $2.23 \times 10^{11}$ | $4.95 \times 10^{10}$ |
|    | 4        | 129.36 | 10.797    | 7.61      | 8.91       | $4.52 \times 10^{10}$ | $3.73 \times 10^{11}$ | $6.46 \times 10^{10}$ | $1.04 \times 10^{11}$ |
| 7  | 1        | 0.00   | 12.987    | -0.19     | 6.2        | $2.37 \times 10^7$    | $3.80 \times 10^{11}$ | $4.55 \times 10^7$    | $2.97 \times 10^{11}$ |
|    | 2        | 44.95  | 9.175     | -7.28     | 2.34       | $3.47 \times 10^{10}$ | $5.42 \times 10^{10}$ | $6.69 \times 10^{10}$ | $4.23 \times 10^{10}$ |
|    | 3        | 135.05 | 9.175     | -7.12     | 2.42       | $3.32 \times 10^{10}$ | $5.80 \times 10^{10}$ | $6.39 \times 10^{10}$ | $4.53 \times 10^{10}$ |
| 8  | 1        | 0.00   | 5.101     | -40.24    | -14.99     | $1.35 \times 10^{12}$ | $7.93 \times 10^{11}$ | -                     | -                     |
|    | 2        | 48.04  | 10.35     | -10.78    | -9.98      | $9.70 \times 10^{10}$ | $3.52 \times 10^{11}$ | -                     | -                     |
|    | 3        | 76.70  | 7.908     | -4.06     | 5.24       | $1.38 \times 10^{10}$ | $9.69 \times 10^{10}$ | -                     | -                     |
|    | 4        | 113.10 | 8.366     | 0.36      | -0.02      | $1.08 \times 10^8$    | $1.41 \times 10^6$    | -                     | --                    |
